# Supplementary material for: Enhancing effect of 5-azacytidine on saline–alkaline resistance of Akebia trifoliata and underlying physiological and transcriptomic mechanisms
Source: PeerJ. 2025 May 14;13:e19285. doi: 10.7717/peerj.19285 (PMC12085116; doi:10.7717/peerj.19285)
Supplement: Supplemental Information 4 [file peerj-13-19285-s004.xls]

## Sheet: Agronomic traits
Plant height（cm)
Con.1	290	Salt.1	178	Salt+5-AzaC.1	170
Con.2	245	Salt.2	184	Salt+5-AzaC.2	178.5
Con.3	247	Salt.3	160	Salt+5-AzaC.3	187
Con.4	284	Salt.4	158	Salt+5-AzaC.4	179
Avg	266.5		170		178.625
STDEV	19.4422		10.583		5.67034
Steme diameter (mm)
Con.1	7.6	Salt.1	4	Salt+5-AzaC.1	5
Con.2	5.7	Salt.2	5.2	Salt+5-AzaC.2	5.6
Con.3	6.8	Salt.3	3.5	Salt+5-AzaC.3	5.7
Con.4	6.5	Salt.4	4.2	Salt+5-AzaC.4	5.3
Avg	6.65		4.225		5.4
STDEV	0.641179		0.582619		0.258199
Plant fresh weight (g)
Con.1	169.5	Salt.1	68.23	Salt+5-AzaC.1	134.26
Con.2	162.37	Salt.2	75.56	Salt+5-AzaC.2	124.89
Con.3	170.77	Salt.3	67.74	Salt+5-AzaC.3	115.17
Con.4	153.42	Salt.4	75.31	Salt+5-AzaC.4	104.38
Avg	164.015		71.71		119.675
STDEV	6.5094		3.51675		10.4791
Root lenght (cm)
Con.1	43	Salt.1	24	Salt+5-AzaC.1	31
Con.2	38	Salt.2	28	Salt+5-AzaC.2	30
Con.3	35	Salt.3	21	Salt+5-AzaC.3	27
Con.4	37	Salt.4	24	Salt+5-AzaC.4	23
Avg	38.25		24.25		27.75
STDEV	2.77889		2.34521		2.93447
Biomass (g)
Con.1	150	Salt.1	30	Salt+5-AzaC.1	55
Con.2	170	Salt.2	55	Salt+5-AzaC.2	35
Con.3	120	Salt.3	25	Salt+5-AzaC.3	43
Con.4	100	Salt.4	25	Salt+5-AzaC.4	35
Avg	135		33.75		42
STDEV	26.9258		12.4373		8.18535
Root shoot ratio (cm)
	0d	30d	30d-0d
Con.1	105	198	93
Con.2	89	170	81
Con.3	93	160	67
Con.4	87	170	83
Avg			81
STDEV			8.74325
	0d	30d	30d-0d
Salt.1	43	72	29
Salt.2	61	75	14
Salt.3	57	84	27
Salt.4	39	77	38
			27
			8.0829
	0d	30d	30d-0d
Salt+5-AzaC.1	47	86	39
Salt+5-AzaC.2	53	93	40
Salt+5-AzaC.3	72	102	30
Salt+5-AzaC.4	41	83	42
			37.75
			4.33974

## Sheet: biochemical indexes
The content of Na+
Con.1	1.66553	Salt.1	3.10469	Salt+5-AzaC.1	2.20522
Con.2	1.70786	Salt.2	3.22109	Salt+5-AzaC.2	2.06765
Con.3	1.70786	Salt.3	3.41156	Salt+5-AzaC.3	2.12056
Con.4	1.66553	Salt.4	3.11527	Salt+5-AzaC.4	2.15231
Avg	1.6867		3.21315		2.13643
STDEV	0.021164		0.123265		0.0499152
The activities of CAD
Con.1	1126.67	Salt.1	469.444	Salt+5-AzaC.1	994.118
Con.2	889.474	Salt.2	734.783	Salt+5-AzaC.2	889.474
Con.3	845	Salt.3	582.759	Salt+5-AzaC.3	1056.25
Con.4	889.474	Salt.4	845	Salt+5-AzaC.4	734.783
Avg	937.654		657.996		918.656
STDEV	118.265		153.138		130.151
The activities of POD
Con.1	48.539	Salt.1	25.6526	Salt+5-AzaC.1	40.5638
Con.2	40.5367	Salt.2	23.2785	Salt+5-AzaC.2	38.5698
Con.3	39.8346	Salt.3	19.4986	Salt+5-AzaC.3	36.5639
Con.4	41.5321	Salt.4	21.3699	Salt+5-AzaC.4	29.8763
Avg	42.6106		22.4499		36.3935
STDEV	3.71544		2.43897		4.29721
The activities of SOD
Con.1	171.158	Salt.1	102.315	Salt+5-AzaC.1	98.1286
Con.2	147.186	Salt.2	110.1	Salt+5-AzaC.2	97
Con.3	133.99	Salt.3	98.492	Salt+5-AzaC.3	110.421
Con.4	145.579	Salt.4	122.267	Salt+5-AzaC.4	92.6592
Avg	149.478		108.293		99.5523
STDEV	25.222		9.69045		7.61991
The contents of H2O2
Con.1	392.392	Salt.1	689.108	Salt+5-AzaC.1	481.083
Con.2	403.825	Salt.2	594.258	Salt+5-AzaC.2	462.542
Con.3	392.333	Salt.3	600.267	Salt+5-AzaC.3	462.25
Con.4	393.617	Salt.4	689.567	Salt+5-AzaC.4	472.542
Avg	395.542		643.3		469.604
STDEV	5.14185		49.2688		8.35571
The contents of MDA
Con.1	35.5463	Salt.1	49.0029	Salt+5-AzaC.1	46.2723
Con.2	31.9897	Salt.2	54.447	Salt+5-AzaC.2	45.2369
Con.3	28.1906	Salt.3	46.6109	Salt+5-AzaC.3	39.4765
Con.4	28.8781	Salt.4	47.874	Salt+5-AzaC.4	42.0394
Avg	31.1512		49.4837		43.2563
STDEV	3.11459		3.19417		2.8679
soluble sugar
Con.1	76.8276	Salt.1	73.4138	Salt+5-AzaC.1	90.9825
Con.2	75.0791	Salt.2	75.1624	Salt+5-AzaC.2	91.9817
Con.3	75.0791	Salt.3	74.5795	Salt+5-AzaC.3	92.9808
Con.4	74.6628	Salt.4	75.4122	Salt+5-AzaC.4	90.7327
Avg	75.4122		74.642		91.6694
STDEV	0.892352		0.823971		0.951179
proline
Con.1	389.47	Salt.1	436.58	Salt+5-AzaC.1	498
Con.2	374.67	Salt.2	475.48	Salt+5-AzaC.2	482.65
Con.3	364.32	Salt.3	453.65	Salt+5-AzaC.3	479.48
Con.4	332.47	Salt.4	458.87	Salt+5-AzaC.4	468.63
Avg	365.233		456.145		482.19
STDEV	22.3654		14.8351		11.2299
The contents of chlorophyll a
Con.1	11.9139	Salt.1	6.09413	Salt+5-AzaC.1	6.56746
Con.2	13.2789	Salt.2	6.22177	Salt+5-AzaC.2	6.03242
Con.3	9.85036	Salt.3	6.71519	Salt+5-AzaC.3	6.21093
Con.4	7.67823	Salt.4	6.89133	Salt+5-AzaC.4	6.73537
Avg	10.6804		6.4806		6.38654
STDEV	2.26626		0.354596		0.297923
chlorophyll b
Con.1	5.4302	Salt.1	1.05084	Salt+5-AzaC.1	3.04408
Con.2	5.8028	Salt.2	1.45356	Salt+5-AzaC.2	3.21464
Con.3	4.60944	Salt.3	0.789	Salt+5-AzaC.3	3.42876
Con.4	5.52884	Salt.4	2.66076	Salt+5-AzaC.4	2.74604
Avg	5.34282		1.48854		3.10838
STDEV	0.475595		0.766488		0.266919
total chlorophyll
Con.1	18.3441	Salt.1	7.14497	Salt+5-AzaC.1	8.61154
Con.2	20.0817	Salt.2	7.67533	Salt+5-AzaC.2	9.24706
Con.3	14.4598	Salt.3	7.50419	Salt+5-AzaC.3	8.63969
Con.4	11.2071	Salt.4	9.55209	Salt+5-AzaC.4	9.48141
Avg	16.0232		7.96915		8.99492
STDEV	3.68384		0.998211		0.404763
carotenoid
Con.1	1.43832	Salt.1	0.64437	Salt+5-AzaC.1	0.893781
Con.2	1.37068	Salt.2	0.58317	Salt+5-AzaC.2	0.884869
Con.3	1.07201	Salt.3	0.721048	Salt+5-AzaC.3	0.931412
Con.4	1.90265	Salt.4	0.589459	Salt+5-AzaC.4	0.880192
Avg	1.44592		0.634512		0.897564
STDEV	0.318086		0.059164		0.0215337

## Sheet: anatomic structure
The leaves	CON						Salt						Salt+5-AzaC
				Avg	STDEV					Avg	STDEV					Avg	STDEV
Leaf thickness	251.53	254.67	250.1	252.1	2.09091		236.43	236.5	231.4	234.777	2.61574		273.54	275.32	271.63	273.497	1.65056
Palisade tissue thickness	19.3	18.4	19.74	19.1467	0.610923		12.4	12.6	12.3	12.4333	0.136626		18.3	18.67	17.95	18.3067	0.322035
Spongy tissue thickness	25.67	23.25	24.64	24.52	1.08624		12.53	12.56	12.37	12.4867	0.0913601		22.56	23.24	22.43	22.7433	0.389084
Epidermal thickness	18.47	18.56	17.96	18.33	0.289413		14.85	14.97	15.21	15.01	0.163951		23.32	24.3	22.86	23.4933	0.657835
Hypoepidermal thickness	17.84	17.73	18.32	17.9633	0.280618		13.45	13.23	13.6	13.4267	0.166453		23.53	23.35	22.5	23.1267	0.492043
The root	CON						Salt						Salt+5-AzaC
				Avg	STDEV					Avg	STDEV					Avg	STDEV
Root cross-section diameter	1882.5	1965.56	1789.75	1879.27	78.6644		2156.56	2221.46	2149.32	2175.78	35.5314		2728.67	2769.34	2864.42	2787.48	62.3135
Cortical thickness	98.56	92.58	108.73	99.9567	7.30308		101.65	99.58	106.82	102.683	3.33529		109.4	123.67	119.84	117.637	6.60601
The phloem thickness	164.75	155.75	175.93	165.477	9.04231		234.65	266.5	248.73	249.96	14.2756		367.54	342.85	391.63	367.34	21.8156
Cambium thickness	168.65	178.53	169.37	172.183	4.92664		117.68	139.62	127.52	128.273	9.8292		159.76	169.28	149.42	159.487	8.88419
Xylem thickness	589.35	586.38	585.56	587.097	1.78353		326.86	322.75	342.42	330.677	9.28019		339.67	352.53	337.53	343.243	7.25681
Xylem catheter diameter	58.79	53.63	57.76	56.7267	2.4425		33.68	38.58	32.65	34.97	2.83398		54.67	56.83	59.62	57.04	2.21968
	CON						Salt						Salt+5-AzaC
The stem				Avg	STDEV					Avg	STDEV					Avg	STDEV
Cortical thickness	143.73	162.37	158.46	154.853	8.79174		55.67	69.54	63.73	62.98	6.23		92.82	106.63	93.84	97.7633	6.88322
The phloem thickness	287.34	294.67	285.82	289.277	4.2326		220.68	216.52	232.75	223.317	7.54015		348.76	313.56	339.67	333.997	16.3438
Cambium thickness	127.57	129.53	132.44	129.847	2.1917		178.65	195.28	196.76	190.23	8.99422		148.68	138.52	148.84	145.347	5.2884
Xylem thickness	524.67	513.63	535.75	524.683	9.89237		439.74	459.63	433.37	444.247	12.2517		496.73	504.63	489.83	497.063	6.6238
Xylem catheter diameter	46.27	59.68	57.52	54.49	6.44004		37.54	47.48	35.68	40.2333	5.67454		58.09	63.76	64.69	62.18	3.19528
Medullary radius	343.63	359.75	355.47	352.95	7.46868		292.45	282.54	299.59	291.527	7.65846		357.83	367.62	368.73	364.727	5.36515
